# Supplementary material
Source: publisher figshare collection journal article supplement (https://frontiersin.figshare.com/ndownloader/files/28432194)
Supplement: Supplementary file [file 28432194]

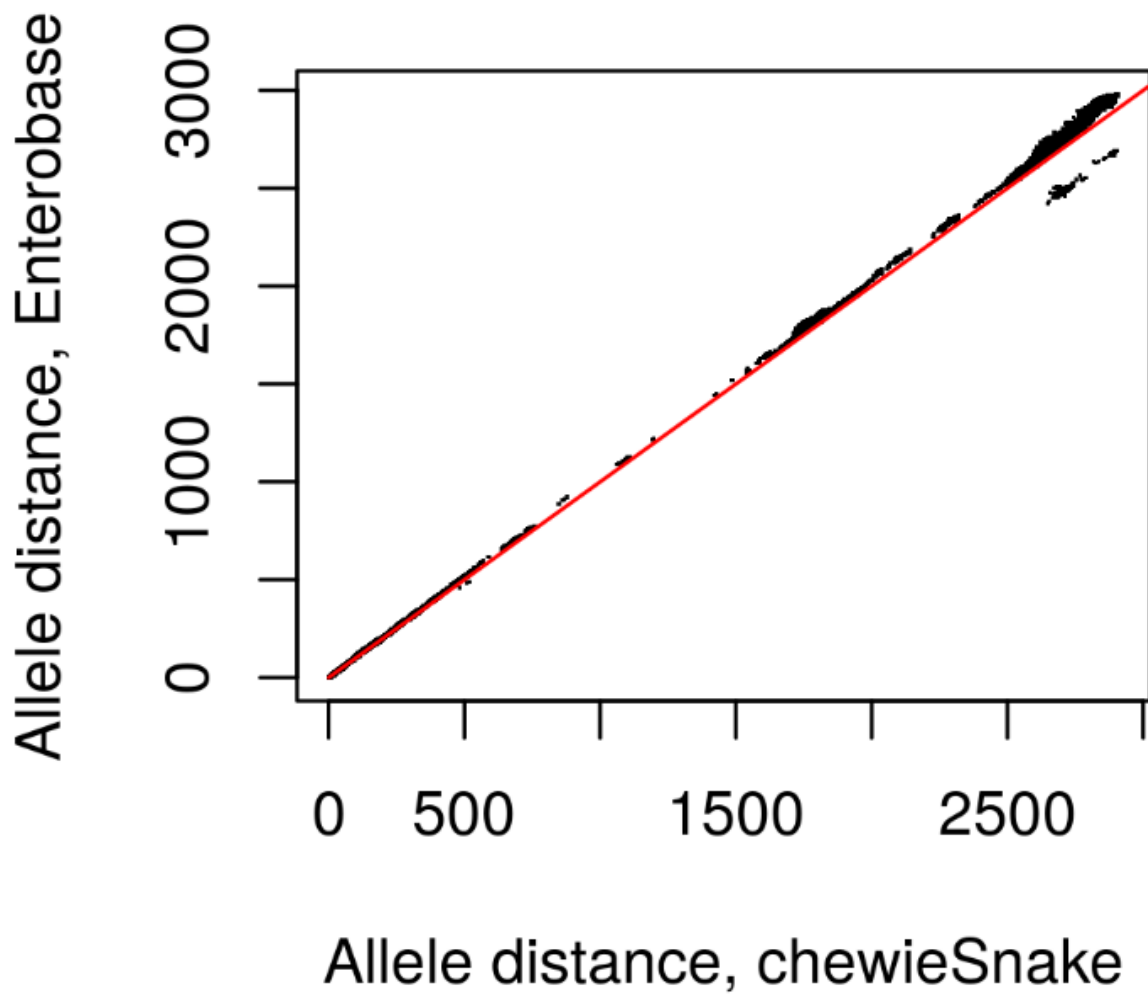

**Supplementary Figure 5:** Comparison of pairwise allele distances for chewieSnake and Enterobase for all commonly identified samples. The distances are strongly correlated throughout all distances and a linear fit reveals a slope of 1.02.
